# Supplementary material for: Gregariousness in the giant sloth Lestodon (Xenarthra): multi-proxy approach of a bonebed from the Last Maximum Glacial of Argentine Pampas
Source: PubMed Central journal article supplement (PMC7331707; doi:10.1038/s41598-020-67863-0), 2020-07-02
Supplement: 41598_2020_67863_MOESM1_ESM.pdf [file 41598_2020_67863_MOESM1_ESM.pdf]

## Supplementary Information for

### **Gregariousness in the giant sloth *Lestodon* (*Xenarthra*): multi-proxy approach of a bonebed from the Last Maximum Glacial of Argentine Pampas**

Rodrigo L. Tomassini<sup>1\*</sup>, Claudia I. Montalvo<sup>2</sup>, Mariana C. Garrone<sup>1</sup>, Laura Domingo<sup>3,4</sup>, Jorge Ferigolo<sup>5</sup>, Laura E. Cruz<sup>6</sup>, Dánae Sanz-Pérez<sup>3</sup>, Ignacio A. Cerda<sup>7</sup>, Yolanda Fernández-Jalvo<sup>8</sup>

<sup>1</sup>INGEOSUR, Departamento de Geología, Universidad Nacional del Sur - CONICET, Bahía Blanca 8000, Argentina. (rodrigo.tomassini@yahoo.com.ar\*, garrone.mariana@gmail.com) \*Corresponding author.

<sup>2</sup>Facultad de Ciencias Exactas y Naturales, Universidad Nacional de La Pampa, Santa Rosa 6300, Argentina. (cmontalvo@exactas.unlpam.edu.ar)

<sup>3</sup>Departamento de Geodinámica, Estratigrafía y Paleontología, Facultad Ciencias Geológicas, Universidad Complutense de Madrid, Madrid 28040, Spain. (ldomingo@ucm.es, dasanz01@ucm.es)

<sup>4</sup>Earth and Planetary Sciences Department, University of California Santa Cruz, Santa Cruz, California 95064, U.S.A.

<sup>5</sup>Museu de Ciências Naturais, Secretaria do Meio Ambiente e Infraestrutura, Porto Alegre 90690-000, Brazil. (jorgeferigolo@gmail.com)

<sup>6</sup>Museo Argentino de Ciencias Naturales (MACN-CONICET), Buenos Aires C1405DJR, Argentina. (cruzlaurae@gmail.com)

<sup>7</sup>Instituto de Investigación en Paleobiología y Geología (IIPG-CONICET), Universidad Nacional de Río Negro y Museo Carlos Ameghino, Cipolletti 8324, Argentina.

(nachocerda6@yahoo.com.ar)

<sup>8</sup>Departamento de Paleobiología, Museo Nacional de Ciencias Naturales (CSIC), Madrid 28006, Spain. ([yfj@mncn.csic.es](mailto:yfj@mncn.csic.es))

**This PDF file includes:**

-Supplementary Table S1 (and references)

-Supplementary Table S2

-Supplementary Table S3

-Supplementary Table S4

**Table S1.** Mammals from Late Pleistocene levels of Playa del Barco site and their estimated body mass (EBM).

| Taxa                                | EBM (kg)                        |
|-------------------------------------|---------------------------------|
| Order Folivora                      |                                 |
| Family Megatheriidae                |                                 |
| <i>Megatherium americanum</i>       | ~6,070 <sup>1,3,5</sup>         |
| Family Mylodontidae                 |                                 |
| <i>Lestodon armatus</i>             | ~3,400-4,100 <sup>1,2,5</sup>   |
| <i>Glossotherium robustum</i>       | ~1,500-1,700 <sup>1,2,3,5</sup> |
| <i>Scelidotherium leptocephalum</i> | ~850-1,050 <sup>1,2,3,5</sup>   |
| Order Cingulata                     |                                 |
| Family Glyptodontidae               |                                 |
| <i>Glyptodon clavipes</i>           | ~2,000 <sup>3,5</sup>           |
| <i>Glyptodon reticulatus</i>        | ~410-860 <sup>1,3,4,5</sup>     |
| <i>Doedicurus clavicaudatus</i>     | ~1,470-1,760 <sup>1,3,5</sup>   |
| <i>Panochthus</i> sp.               | ~1,050-1,330 <sup>1,3,4,5</sup> |
| Order Notoungulata                  |                                 |
| Family Toxodontidae                 |                                 |
| <i>Toxodon platensis</i>            | ~1,640 <sup>1,3,5</sup>         |
| Order Litopterna                    |                                 |
| Family Macraucheniiidae             |                                 |
| <i>Macrauchenia patachonica</i>     | ~1,000 <sup>1,3,5</sup>         |
| Order Proboscidea                   |                                 |
| Family Gomphotheriidae              |                                 |
| <i>Stegomastodon platensis</i>      | ~7,500-7,600 <sup>3,5</sup>     |
| Order Artiodactyla                  |                                 |
| Family Cervidae                     |                                 |
| <i>Morenelaphus</i> sp.             | ~50 <sup>3,5</sup>              |
| Order Perissodactyla                |                                 |
| Family Equidae                      |                                 |
| <i>Hippidion</i> sp.                | ~500 <sup>1,3</sup>             |
| <i>Equus (Amerhippus) neogeus</i>   | ~300 <sup>3,5</sup>             |
| Order Carnivora                     |                                 |
| Family Felidae                      |                                 |
| <i>Smilodon populator</i>           | ~300-400 <sup>3,5</sup>         |

## References

1. Fariña, R. A., Vizcaíno, S. F., Bargo, M. S. Body mass estimations in Lujanian (Late Pleistocene-Early Holocene of South America) mammal megafauna. *Mastozoología Neotropical* **5**, 87–108 (1998).

2. Bargo, M. S., Vizcaíno, S. F., Archuby, F. M., Blanco, R. E. Limb bone proportions, strength and digging in some Lujanian (Late Pleistocene-Early Holocene) mylodontid ground sloths (Mammalia, Xenarthra). *J. Verteb. Paleontol.* **20**, 601–610 (2000).
3. Prevosti, F. J., Vizcaíno, S. F. Paleoecology of the large carnivore guild from the late Pleistocene of Argentina. *Acta Palaeontol. Polonica* **51**, 407–422 (2006).
4. Vizcaíno, S. F., Blanco, R. E., Bender, J. B., Milne, N. Proportions and function of the limbs of glyptodonts. *Lethaia* **44**, 93–101 (2011).
5. Fariña, R. A., Vizcaíno, S. F., De Iuliis, G. *Megafauna: giant beasts of Pleistocene South America*. Bloomington, Indiana University Press. 416 (2013).

**Table S2.** Summary of stable isotope dataset from Playa del Barco. Taxa, number of carbonate samples (# C), mean and standard deviation (SD)  $\delta^{13}\text{C}$  (‰ VPDB),  $\delta^{18}\text{O}_{\text{CO}_3}$  (‰ VSMOW), number of phosphate samples (# P), mean and standard deviation (SD)  $\delta^{18}\text{O}_{\text{PO}_4}$  (‰ VSMOW), and difference between  $\delta^{18}\text{O}_{\text{CO}_3}$  and  $\delta^{18}\text{O}_{\text{PO}_4}$  values ( $\Delta \delta^{18}\text{O}_{\text{CO}_3} - \delta^{18}\text{O}_{\text{PO}_4}$ ).

| Taxa                               | # C | Mean $\delta^{13}\text{C}$ | SD $\delta^{13}\text{C}$ | Mean $\delta^{18}\text{O}_{\text{CO}_3}$ | SD $\delta^{18}\text{O}_{\text{CO}_3}$ | # P | Mean $\delta^{18}\text{O}_{\text{PO}_4}$ | SD $\delta^{18}\text{O}_{\text{PO}_4}$ | $\Delta \delta^{18}\text{O}_{\text{CO}_3} - \delta^{18}\text{O}_{\text{PO}_4}$ |
|------------------------------------|-----|----------------------------|--------------------------|------------------------------------------|----------------------------------------|-----|------------------------------------------|----------------------------------------|--------------------------------------------------------------------------------|
|                                    |     | (‰ VPDB)                   | (‰ VPDB)                 | (‰ VSMOW)                                | (‰ VSMOW)                              |     | (‰ VSMOW)                                | (‰ VSMOW)                              |                                                                                |
| All taxa                           | 36  | -6.3                       | 2.6                      | 28.6                                     | 0.9                                    | 23  | 19.7                                     | 1.2                                    | 8.9                                                                            |
| <i>Lestodon armatus</i>            | 6   | -3.8                       | 1.6                      | 27.9                                     | 0.5                                    | 5   | 18.8                                     | 0.6                                    | 9.1                                                                            |
| <i>Megatherium americanum</i>      | 2   | -7.1                       | 0.1                      | 28.2                                     | 0.1                                    | 2   | 18.7                                     | 0.1                                    | 9.5                                                                            |
| <i>Scelidotherium leptcephalum</i> | 1   | -3.9                       | -                        | 26.8                                     | -                                      | 1   | 18.0                                     | -                                      | 8.8                                                                            |
| <i>Toxodon platensis</i>           | 9   | -5.1                       | 1.7                      | 28.2                                     | 0.9                                    | 6   | 19.8                                     | 1.1                                    | 8.4                                                                            |
| <i>Stegomastodon platensis</i>     | 5   | -6.3                       | 2.1                      | 29.1                                     | 1.0                                    | 4   | 20.7                                     | 1.2                                    | 8.4                                                                            |
| <i>Equus (Amerhippus) neogeus</i>  | 1   | -6.7                       | -                        | 29.1                                     | -                                      |     |                                          |                                        |                                                                                |
| <i>Morenelaphus</i> sp.            | 7   | -10.2                      | 0.8                      | 29.3                                     | 0.4                                    | 5   | 20.7                                     | 0.8                                    | 8.6                                                                            |
| <i>Smilodon populator</i>          | 5   | -7.9                       | 0.6                      | 29.2                                     | 0.5                                    |     |                                          |                                        |                                                                                |

**Table S3.** ANOVA and Tukey post-hoc tests for  $\delta^{13}\text{C}$  (‰ VPDB),  $\delta^{18}\text{O}_{\text{CO}_3}$  (‰ VSMOW) and  $\delta^{18}\text{O}_{\text{PO}_4}$  (‰ VSMOW) values among mammalian species from Playa del Barco.

| $\delta^{13}\text{C}$ (‰ VPDB) (F = 16.348; p < 0.001) | <i>Toxodon platensis</i> | <i>Megatherium americanum</i> | <i>Lestodon armatus</i> | <i>Stegomastodon platensis</i> | <i>Morenelaphus</i> sp. | <i>Smilodon populator</i> |
|--------------------------------------------------------|--------------------------|-------------------------------|-------------------------|--------------------------------|-------------------------|---------------------------|
| <i>Toxodon platensis</i>                               | -                        |                               |                         |                                |                         |                           |
| <i>Megatherium americanum</i>                          | 0.455                    | -                             |                         |                                |                         |                           |
| <i>Lestodon armatus</i>                                | 0.569                    | 0.081                         | -                       |                                |                         |                           |
| <i>Stegomastodon platensis</i>                         | 0.672                    | 0.976                         | 0.084                   | -                              |                         |                           |
| <i>Morenelaphus</i> sp.                                | < 0.001                  | 0.115                         | < 0.001                 | 0.001                          | -                       |                           |
| <i>Smilodon populator</i>                              | 0.016                    | 0.987                         | 0.001                   | 0.474                          | 0.100                   | -                         |

  

| $\delta^{18}\text{O}_{\text{CO}_3}$ (‰ VSMOW) (F = 4.594; p = 0.003) | <i>Toxodon platensis</i> | <i>Megatherium americanum</i> | <i>Lestodon armatus</i> | <i>Stegomastodon platensis</i> | <i>Morenelaphus</i> sp. | <i>Smilodon populator</i> |
|----------------------------------------------------------------------|--------------------------|-------------------------------|-------------------------|--------------------------------|-------------------------|---------------------------|
| <i>Toxodon platensis</i>                                             | -                        |                               |                         |                                |                         |                           |
| <i>Megatherium americanum</i>                                        | 1.000                    | -                             |                         |                                |                         |                           |
| <i>Lestodon armatus</i>                                              | 0.941                    | 0.995                         | -                       |                                |                         |                           |
| <i>Stegomastodon platensis</i>                                       | 0.277                    | 0.654                         | 0.087                   | -                              |                         |                           |
| <i>Morenelaphus</i> sp.                                              | 0.051                    | 0.375                         | 0.013                   | 0.994                          | -                       |                           |
| <i>Smilodon populator</i>                                            | 0.119                    | 0.463                         | 0.034                   | 0.998                          | 1.000                   | -                         |

  

| $\delta^{18}\text{O}_{\text{PO}_4}$ (‰ VSMOW) (F = 4.346; p = 0.013) | <i>Toxodon platensis</i> | <i>Megatherium americanum</i> | <i>Lestodon armatus</i> | <i>Stegomastodon platensis</i> | <i>Morenelaphus</i> sp. |
|----------------------------------------------------------------------|--------------------------|-------------------------------|-------------------------|--------------------------------|-------------------------|
| <i>Toxodon platensis</i>                                             | -                        |                               |                         |                                |                         |
| <i>Megatherium americanum</i>                                        | 0.651                    | -                             |                         |                                |                         |
| <i>Lestodon armatus</i>                                              | 0.449                    | 1.000                         | -                       |                                |                         |
| <i>Stegomastodon platensis</i>                                       | 0.560                    | 0.153                         | 0.052                   | -                              |                         |
| <i>Morenelaphus</i> sp.                                              | 0.424                    | 0.111                         | 0.028                   | 1.000                          | -                       |

**Table S4.** Stable isotope total dataset from Playa del Barco. Collection number, order, family, genus/species, analyzed tissue,  $\delta^{13}\text{C}$  (‰ VPDB),  $\delta^{18}\text{O}_{\text{CO}_3}$  (‰ VPDB),  $\delta^{18}\text{O}_{\text{CO}_3}$  (‰ VSMOW),  $\delta^{18}\text{O}_{\text{PO}_4}$  (‰ VSMOW), and difference between  $\delta^{18}\text{O}_{\text{CO}_3}$  and  $\delta^{18}\text{O}_{\text{PO}_4}$  values ( $\Delta \delta^{18}\text{O}_{\text{CO}_3} - \delta^{18}\text{O}^{\text{PO}_4}$ ).

| Collection number | Order          | Family         | Genus/Species                       | Analyzed tissue | $\delta^{13}\text{C}$ (‰ VPDB) | $\delta^{18}\text{O}_{\text{CO}_3}$ (‰ VPDB) | $\delta^{18}\text{O}_{\text{CO}_3}$ (‰ VSMOW) | $\delta^{18}\text{O}_{\text{PO}_4}$ (‰ VSMOW) | $\Delta \delta^{18}\text{O}_{\text{CO}_3} - \delta^{18}\text{O}^{\text{PO}_4}$ |
|-------------------|----------------|----------------|-------------------------------------|-----------------|--------------------------------|----------------------------------------------|-----------------------------------------------|-----------------------------------------------|--------------------------------------------------------------------------------|
| MD-PDB-85-42      | Notoungulata   | Toxodontidae   | <i>Toxodon platensis</i>            | Tooth enamel    | -7.0                           | -1.9                                         | 28.9                                          |                                               |                                                                                |
| MD-PDB-85-134     | Notoungulata   | Toxodontidae   | <i>Toxodon platensis</i>            | Tooth enamel    | -5.5                           | -2.4                                         | 28.4                                          |                                               |                                                                                |
| MD-PDB-85-41      | Notoungulata   | Toxodontidae   | <i>Toxodon platensis</i>            | Tooth enamel    | -2.5                           | -2.6                                         | 28.2                                          | 20.0                                          | 8.2                                                                            |
| Without signature | Notoungulata   | Toxodontidae   | <i>Toxodon platensis</i>            | Tooth enamel    | -4.8                           | -2.8                                         | 28.0                                          | 19.8                                          | 8.2                                                                            |
| MD-PDB-85-279     | Notoungulata   | Toxodontidae   | <i>Toxodon platensis</i>            | Tooth enamel    | -4.8                           | -1.6                                         | 29.3                                          | 21.2                                          | 8.0                                                                            |
| MD-PDB-90-26      | Notoungulata   | Toxodontidae   | <i>Toxodon platensis</i>            | Tooth enamel    | -6.9                           | -3.1                                         | 27.7                                          | 20.0                                          | 7.7                                                                            |
| MD-PDB-97-13      | Notoungulata   | Toxodontidae   | <i>Toxodon platensis</i>            | Tooth enamel    | -2.4                           | -2.8                                         | 28.0                                          | 19.6                                          | 8.4                                                                            |
| MD-PDB-7002       | Notoungulata   | Toxodontidae   | <i>Toxodon platensis</i>            | Tooth enamel    | -6.4                           | -4.3                                         | 26.4                                          | 18.0                                          | 8.5                                                                            |
| MD-PDB-7001       | Notoungulata   | Toxodontidae   | <i>Toxodon platensis</i>            | Tooth enamel    | -5.1                           | -1.7                                         | 29.1                                          |                                               |                                                                                |
| MD-PDB-97-1-1     | Folivora       | Mylodontidae   | <i>Scelidothorium leptocephalum</i> | Orthodentine    | -3.9                           | -4.0                                         | 26.8                                          | 18.0                                          | 8.8                                                                            |
| MD-PDB-90-30      | Folivora       | Megatheriidae  | <i>Megatherium americanum</i>       | Orthodentine    | -7.0                           | -2.7                                         | 28.1                                          | 18.7                                          | 9.4                                                                            |
| MD-PDB-05-192     | Folivora       | Megatheriidae  | <i>Megatherium americanum</i>       | Orthodentine    | -7.2                           | -2.5                                         | 28.3                                          | 18.8                                          | 9.5                                                                            |
| MD-PDB-99-63-2    | Folivora       | Mylodontidae   | <i>Lestodon armatus</i>             | Orthodentine    | -2.3                           | -2.4                                         | 28.4                                          | 19.6                                          | 8.8                                                                            |
| MD-PDB-29-90-1    | Folivora       | Mylodontidae   | <i>Lestodon armatus</i>             | Orthodentine    | -4.7                           | -2.6                                         | 28.2                                          | 18.9                                          | 9.3                                                                            |
| MD-PDB-29-90-2    | Folivora       | Mylodontidae   | <i>Lestodon armatus</i>             | Orthodentine    | -3.7                           | -3.3                                         | 27.5                                          |                                               |                                                                                |
| MD-PDB-85-75      | Folivora       | Mylodontidae   | <i>Lestodon armatus</i>             | Orthodentine    | -6.5                           | -3.2                                         | 27.6                                          | 18.5                                          | 9.2                                                                            |
| MD-PDB-05-113     | Folivora       | Mylodontidae   | <i>Lestodon armatus</i>             | Orthodentine    | -3.3                           | -3.4                                         | 27.4                                          | 18.0                                          | 9.4                                                                            |
| MD-PDB-00-8       | Folivora       | Mylodontidae   | <i>Lestodon armatus</i>             | Orthodentine    | -2.2                           | -2.5                                         | 28.3                                          | 19.0                                          | 9.3                                                                            |
| MD-PDB-85-274     | Proboscidea    | Gomphoteriidae | <i>Stegomastodon platensis</i>      | Tooth enamel    | -7.4                           | -0.5                                         | 30.4                                          | 21.9                                          | 8.5                                                                            |
| MD-PDB-85-261     | Proboscidea    | Gomphoteriidae | <i>Stegomastodon platensis</i>      | Tooth enamel    | -8.4                           | -1.4                                         | 29.5                                          | 20.5                                          | 9.0                                                                            |
| MD-PDB-85-19      | Proboscidea    | Gomphoteriidae | <i>Stegomastodon platensis</i>      | Tooth enamel    | -6.1                           | -3.0                                         | 27.8                                          | 19.1                                          | 8.8                                                                            |
| MD-PDB-08-20      | Proboscidea    | Gomphoteriidae | <i>Stegomastodon platensis</i>      | Tooth enamel    | -3.0                           | -1.7                                         | 29.2                                          | 21.2                                          | 8.0                                                                            |
| MD-PDB-99-43      | Proboscidea    | Gomphoteriidae | <i>Stegomastodon platensis</i>      | Tooth enamel    | -6.4                           | -2.4                                         | 28.5                                          |                                               |                                                                                |
| MD-PDB-90-17      | Perissodactyla | Equidae        | <i>Equus (Amerhippus) neogeus</i>   | Tooth enamel    | -6.7                           | -1.8                                         | 29.1                                          |                                               |                                                                                |
| MD-PDB-84-5       | Artiodactyla   | Cervidae       | <i>Morenelaphus</i> sp.             | Tooth enamel    | -10.4                          | -1.7                                         | 29.2                                          | 21.1                                          | 8.1                                                                            |
| MD-PDB-84-5       | Artiodactyla   | Cervidae       | <i>Morenelaphus</i> sp.             | Tooth enamel    | -10.4                          | -1.9                                         | 28.9                                          | 20.3                                          | 8.7                                                                            |

|                |              |          |                           |              |       |      |      |      |     |
|----------------|--------------|----------|---------------------------|--------------|-------|------|------|------|-----|
| MD-PDB-84-4    | Artiodactyla | Cervidae | <i>Morenelaphus</i> sp.   | Tooth enamel | -11.4 | -1.4 | 29.4 | 19.9 | 9.6 |
| MD-PDB-84-4    | Artiodactyla | Cervidae | <i>Morenelaphus</i> sp.   | Tooth enamel | -9.6  | -1.4 | 29.5 | 20.6 | 8.9 |
| MD-PDB-05-2    | Artiodactyla | Cervidae | <i>Morenelaphus</i> sp.   | Tooth enamel | -9.0  | -0.9 | 30.0 | 22.0 | 8.0 |
| MD-PDB-05-110  | Artiodactyla | Cervidae | <i>Morenelaphus</i> sp.   | Tooth enamel | -10.3 | -1.6 | 29.3 |      |     |
| MD-PDB-05-108  | Artiodactyla | Cervidae | <i>Morenelaphus</i> sp.   | Tooth enamel | -10.4 | -2.2 | 28.7 |      |     |
| MD-PDB-83-99-1 | Carnivora    | Felidae  | <i>Smilodon populator</i> | Tooth enamel | -7.6  | -1.6 | 29.3 |      |     |
| MD-PDB-83-99-2 | Carnivora    | Felidae  | <i>Smilodon populator</i> | Tooth enamel | -7.1  | -1.1 | 29.8 |      |     |
| MD-PDB-83-99-3 | Carnivora    | Felidae  | <i>Smilodon populator</i> | Tooth enamel | -8.6  | -2.2 | 28.6 |      |     |
| MD-PDB-83-99-4 | Carnivora    | Felidae  | <i>Smilodon populator</i> | Tooth enamel | -8.5  | -2.0 | 28.8 |      |     |
| MD-PDB-83-99-5 | Carnivora    | Felidae  | <i>Smilodon populator</i> | Tooth enamel | -7.7  | -1.2 | 29.7 |      |     |

---
